# Supplementary material
Source: ML conference proceedings conference paper supplement (https://proceedings.neurips.cc/paper_files/paper/2016/hash/c86a7ee3d8ef0b551ed58e354a836f2b-Abstract.html)
Supplement: Supplementary file [file c86a7ee3d8ef0b551ed58e354a836f2b-Supplemental.zip]

---

# Supplementary Materials: Barzilai-Borwein Step Size for Stochastic Gradient Descent

---

**Conghui Tan**

The Chinese University of Hong Kong  
chtan@se.cuhk.edu.hk

**Shiqian Ma**

The Chinese University of Hong Kong  
sqma@se.cuhk.edu.hk

**Yu-Hong Dai**

Chinese Academy of Sciences, Beijing, China  
dyh@lsec.cc.ac.cn

**Yuqiu Qian**

The University of Hong Kong  
qyq79@connect.hku.hk

## 1 Proofs

### 1.1 Proof of Lemma 1

Before proving Lemma 1, we first state the following lemma which is from [4] and will be useful in our proof.

**Lemma 2** (co-coercivity). *If  $f(x) : \mathbb{R}^d \rightarrow \mathbb{R}$  is convex and its gradient is  $L$ -Lipschitz continuous, then*

$$\|\nabla f(x) - \nabla f(y)\|_2^2 \leq L(x - y)^\top (\nabla f(x) - \nabla f(y)), \quad \forall x, y \in \mathbb{R}^d.$$

Now we prove Lemma 1.

*Proof of Lemma 1.* Let  $v_{i_t}^t = \nabla f_{i_t}(x_t) - \nabla f_{i_t}(\tilde{x}_k) + \nabla F(\tilde{x}_k)$  for the  $k$ -th epoch of SVRG-I or SVRG-BB. Then,

$$\begin{aligned} \mathbb{E}\|v_{i_t}^t\|_2^2 &= \mathbb{E}\|(\nabla f_{i_t}(x_t) - \nabla f_{i_t}(x^*)) - (\nabla f_{i_t}(\tilde{x}_k) - \nabla f_{i_t}(x^*)) + \nabla F(\tilde{x}_k)\|_2^2 \\ &\leq 2\mathbb{E}\|\nabla f_{i_t}(x_t) - \nabla f_{i_t}(x^*)\|_2^2 + 4\mathbb{E}\|\nabla f_{i_t}(\tilde{x}_k) - \nabla f_{i_t}(x^*)\|_2^2 + 4\|\nabla F(\tilde{x}_k)\|_2^2 \\ &\leq 2L\mathbb{E}[(x_t - x^*)^\top (\nabla f_{i_t}(x_t) - \nabla f_{i_t}(x^*))] + 4L^2\|\tilde{x}_k - x^*\|_2^2 + 4L^2\|\tilde{x}_k - x^*\|_2^2 \\ &= 2L(x_t - x^*)^\top \nabla F(x_t) + 8L^2\|\tilde{x}_k - x^*\|_2^2, \end{aligned}$$

where in the first inequality we used the inequality  $(a - b)^2 \leq 2a^2 + 2b^2$  twice, in the second inequality we applied Lemma 2 to  $f_{i_t}(x)$  and used the Lipschitz continuity of  $\nabla f_{i_t}$  and  $\nabla F$ , and in the last equality we used the facts that  $\mathbb{E}[\nabla f_{i_t}(x)] = \nabla F(x)$  and  $\nabla F(x^*) = 0$ .

In the next, we bound the distance of  $x_{t+1}$  to  $x^*$  conditioned on  $x_t$  and  $\tilde{x}_k$ .

$$\begin{aligned} &\mathbb{E}\|x_{t+1} - x^*\|_2^2 \\ &= \mathbb{E}\|x_t - \eta_k v_{i_t}^t - x^*\|_2^2 \\ &= \|x_t - x^*\|_2^2 - 2\eta_k \mathbb{E}[(x_t - x^*)^\top v_{i_t}^t] + \eta_k^2 \mathbb{E}\|v_{i_t}^t\|_2^2 \\ &= \|x_t - x^*\|_2^2 - 2\eta_k (x_t - x^*)^\top \nabla F(x_t) + \eta_k^2 \mathbb{E}\|v_{i_t}^t\|_2^2 \\ &\leq \|x_t - x^*\|_2^2 - 2\eta_k (x_t - x^*)^\top \nabla F(x_t) + 2\eta_k^2 L(x_t - x^*)^\top \nabla F(x_t) + 8\eta_k^2 L^2 \|\tilde{x}_k - x^*\|_2^2 \\ &= \|x_t - x^*\|_2^2 - 2\eta_k (1 - \eta_k L)(x_t - x^*)^\top \nabla F(x_t) + 8\eta_k^2 L^2 \|\tilde{x}_k - x^*\|_2^2 \\ &\leq \|x_t - x^*\|_2^2 - 2\eta_k \mu (1 - \eta_k L) \|x_t - x^*\|^2 + 8\eta_k^2 L^2 \|\tilde{x}_k - x^*\|_2^2 \\ &= [1 - 2\eta_k \mu (1 - \eta_k L)] \|x_t - x^*\|_2^2 + 8\eta_k^2 L^2 \|\tilde{x}_k - x^*\|_2^2, \end{aligned}$$

where in the third equality we used the fact that  $\mathbb{E}[v_{it}^t] = \nabla F(x_t)$ , and in the second inequality we used the strong convexity of  $F(x)$ .

By recursively applying the above inequality over  $t$ , and noting that  $\tilde{x}_k = x_0$  and  $\tilde{x}_{k+1} = x_m$ , we can obtain

$$\begin{aligned}
& \mathbb{E} \|\tilde{x}_{k+1} - x^*\|_2^2 \\
& \leq [1 - 2\eta_k \mu(1 - \eta L)]^m \|\tilde{x}_k - x^*\|_2^2 + 8\eta_k^2 L^2 \sum_{j=0}^{m-1} [1 - 2\eta_k \mu(1 - \eta L)]^j \|\tilde{x}_k - x^*\|_2^2 \\
& < \left[ (1 - 2\eta_k \mu(1 - \eta L))^m + \frac{4\eta_k L^2}{\mu(1 - \eta_k L)} \right] \|\tilde{x}_k - x^*\|_2^2 \\
& = \alpha_k \|\tilde{x}_k - x^*\|_2^2.
\end{aligned}$$

□

## 1.2 Proof of Theorem 1

*Proof of Theorem 1.* Using the strong convexity of function  $F(x)$ , it is easy to obtain the following upper bound for the BB step size computed in Algorithm 1.

$$\begin{aligned}
\eta_k &= \frac{1}{m} \cdot \frac{\|\tilde{x}_k - \tilde{x}_{k-1}\|_2^2}{(\tilde{x}_k - \tilde{x}_{k-1})^\top (g_k - g_{k-1})} \\
&\leq \frac{1}{m} \cdot \frac{\|\tilde{x}_k - \tilde{x}_{k-1}\|_2^2}{\mu \|\tilde{x}_k - \tilde{x}_{k-1}\|_2^2} = \frac{1}{m\mu}.
\end{aligned}$$

Similarly, by the  $L$ -Lipschitz continuity of  $\nabla F(x)$ , it is easy to obtain that  $\eta_k$  is uniformly lower bounded by  $1/(mL)$ . Therefore,  $\alpha_k$  in (8) can be bounded as:

$$\begin{aligned}
\alpha_k &\leq \left[ 1 - \frac{2\mu}{mL} \left( 1 - \frac{L}{m\mu} \right) \right]^m + \frac{4L^2}{m\mu^2[1 - L/(m\mu)]} \\
&\leq \exp \left\{ -\frac{2\mu}{mL} \left( 1 - \frac{L}{m\mu} \right) \cdot m \right\} + \frac{4L^2}{m\mu^2[1 - L/(m\mu)]} \\
&= \exp \left\{ -\frac{2\mu}{L} + \frac{2}{m} \right\} + \frac{4L^2}{m\mu^2 - L\mu},
\end{aligned}$$

Substituting (10) into the above inequality yields

$$\alpha_k < \exp \left\{ -\frac{2\mu}{L} + \log(1 - 2\theta) + \frac{2\mu}{L} \right\} + \frac{4L^2}{4L^2/\theta + L\mu - L\mu} = (1 - 2\theta) + \theta = 1 - \theta.$$

The desired result follows by applying Lemma 1. □

## 2 SAG-BB Algorithm

The stochastic averaged gradient method with BB step size (SAG-BB) is shown in Algorithm 3. Because we choose  $\phi(k) \equiv 1$  in the smoothing technique, it is easy to see the smoothed step size  $\tilde{\eta}_t$  is equal to the geometric mean of all previous BB step sizes.

## 3 Sensitivity of SVRG-BB to $m$

In this section, we empirically study the sensitivity of SVRG-BB to its inner iteration number:  $m$ . We tested both SVRG-BB and SVRG for several choices of  $m$ . The initial step sizes  $\eta_0$  of SVRG-BB were randomly chosen, and we used the best-tuned fixed step sizes for SVRG. The comparison results are shown in Figure 3.

From Figure 3, we can see that for the same  $m$ , SVRG-BB usually needs slightly more number of passes over the data, to obtain the same sub-optimality compared to SVRG with best-tuned step size.

---

**Algorithm 3** SAG with BB step size (SAG-BB)

---

**Parameters:** update frequency  $m$ , initial step sizes  $\eta_0$  and  $\eta_1$  (only used in the first two epochs), weighting parameter  $\beta \in (0, 1)$ , initial point  $\tilde{x}_0$   
 $y_i = 0$  for  $i = 1, \dots, n$   
**for**  $k = 0, 1, \dots$  **do**  
  **if**  $k > 0$  **then**  
     $\eta_k = \frac{1}{m} \cdot \|\tilde{x}_k - \tilde{x}_{k-1}\|_2^2 / |(\tilde{x}_k - \tilde{x}_{k-1})^\top (\hat{g}_k - \hat{g}_{k-1})|$   
     $\tilde{\eta}_k = \left( \prod_{j=2}^k \eta_j \right)^{\frac{1}{k-1}}$  ▷ smoothing technique  
  **end if**  
   $x_0 = \tilde{x}_k$   
   $\hat{g}_{k+1} = 0$   
  **for**  $t = 0, \dots, m-1$  **do**  
    Randomly pick  $i_t \in \{1, \dots, n\}$   
     $y_{i_t} = \nabla f_{i_t}(x_t)$   
     $x_{t+1} = x_t - \frac{\eta_k}{n} \sum_{i=1}^n y_i$  ▷ SAG update  
     $\hat{g}_{k+1} = \beta \nabla f_{i_t}(x_t) + (1 - \beta) \hat{g}_{k+1}$   
  **end for**  
   $\tilde{x}_{k+1} = x_m$   
**end for**

---

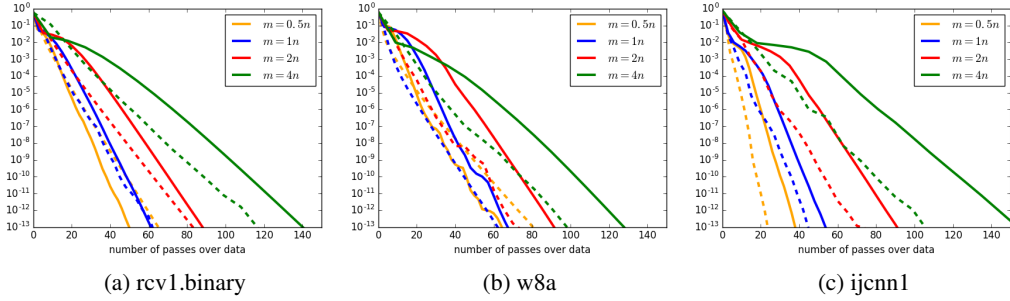

Figure 3: Comparison of SVRG-BB and best-tuned SVRG over different values of  $m$ . The  $x$ -axes all denote the number of passes over the data, and the  $y$ -axes all denote the sub-optimality  $F(x_k) - F(x^*)$ . In each sub-figure, the solid lines stand for SVRG-BB, while dashed lines with the same colors stand for SVRG with the same  $m$ .

However, after a few number of passes over the data, SVRG-BB reaches the same sub-optimality as SVRG with best-tuned step size. These results are consistent with our previous experimental results in Section 5.1 of the paper. Further more, when  $m$  is small, the performance of SVRG-BB is usually close to or even superior than SVRG with best-tuned step size. This is natural because step sizes are updates more frequently when  $m$  is small, and the initialization time spent by SVRG-BB in adjusting step sizes is thus almost ignorable.

## 4 Numerical Comparisons with Other Methods

In this section, we compare our SVRG-BB (Algorithm 1,) SGD-BB (Algorithm 2) and SAG-BB (Algorithm 3) with several existing methods: MISO-2 [3], AdaGrad [1], Adam [2], vSGD [6], SAG with line search (denoted as SAG-L) [5], and a stochastic quasi-Newton method: oLBFGS [7]. For SVRG-BB, we set  $m = 2n$ ; while for both SGD-BB and SAG-BB, we set  $m = n$  and  $\beta = 10/m$ . Because these methods have very different per-iteration complexity, we compare their CPU times needed to achieve the same sub-optimality.

Figures 4(a), 4(b) and 4(c) show the comparison results of SVRG-BB and MISO-2. We see from these figures that SVRG-BB is faster than MISO-2.

Figures 4(d), 4(e) and 4(f) show the comparison results of SGD-BB and AdaGrad. From these figures we see that AdaGrad usually has a very quick start, but in many cases the convergence becomes slow

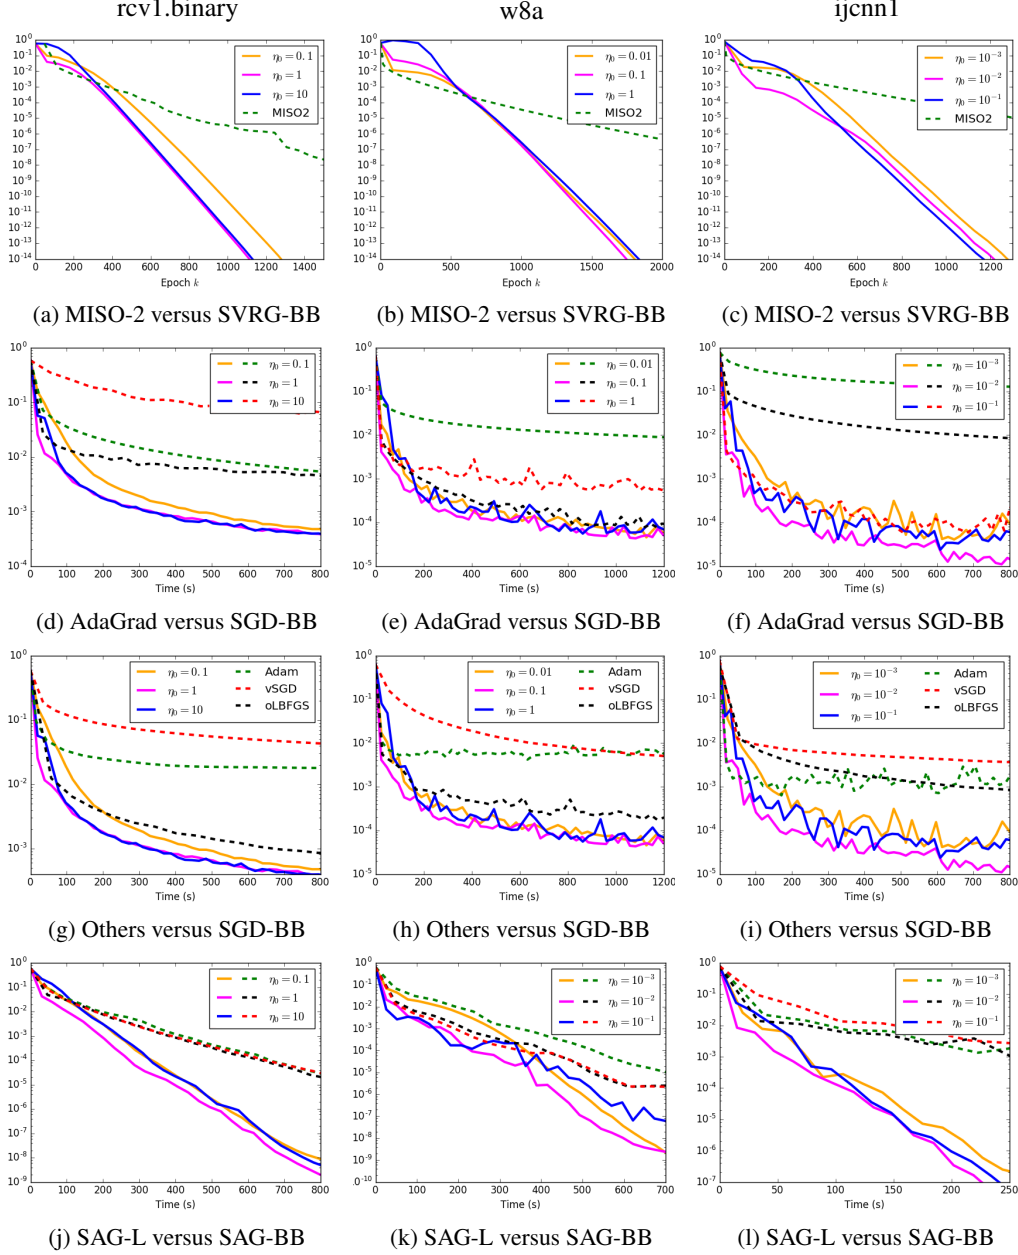

Figure 4: Comparison between SVRG-BB, SGD-BB and SAG-BB with some existing related methods. The  $x$ -axes all denote the CPU time (in seconds). The  $y$ -axes all denote the sub-optimality  $F(x_k) - F(x^*)$ . In the first row, solid lines stand for SVRG-BB, and dashed lines stand for MISO-2; In the second and third rows, solid lines stand for SGD-BB, and dashed lines stand for AdaGrad, Adam, vSGD and oLBFGS respectively; In the final row, solid lines denote SAG-BB, while dashed ones stand for SAG with line search.

in later iterations. Besides, AdaGrad is still somewhat sensitive to the initial step sizes. Especially, when a small initial step size is used, AdaGrad is not able to increase the step size to a suitable level. As a contrast, SGD-BB converges very fast in all three tested problems, and it is not sensitive to the initial step size  $\eta_0$ .

In Figures 4(g), 4(h) and 4(i), we further compared SGD-BB with Adam, vSGD and oLBFGS. Again, we observed that our SGD-BB is faster than these compared methods.

Figures 4(j), 4(k) and 4(l) show the comparison results of SAG-BB and SAG-L. From these figures we see that the SAG-L is quite robust and is not sensitive to the choice of  $\eta_0$ . However, SAG-BB is faster than SAG-L to reach the same sub-optimality on the tested problems.

## References

- [1] J. Duchi, E. Hazan, and Y. Singer. Adaptive subgradient methods for online learning and stochastic optimization. *The Journal of Machine Learning Research*, 12:2121–2159, 2011.
- [2] D. Kingma and J. Ba. Adam: A method for stochastic optimization. *arXiv preprint arXiv:1412.6980*, 2014.
- [3] J. Mairal. Incremental majorization-minimization optimization with application to large-scale machine learning. *SIAM Journal on Optimization*, 25(2):829–855, 2015.
- [4] Y. Nesterov. *Introductory lectures on convex optimization*, volume 87. Springer Science & Business Media, 2004.
- [5] R. L. Roux, M. Schmidt, and F. Bach. A stochastic gradient method with an exponential convergence rate for finite training sets. In *Advances in Neural Information Processing Systems*, pages 2663–2671, 2012.
- [6] T. Schaul, S. Zhang, and Y. LeCun. No more pesky learning rates. *ICML (3)*, 28:343–351, 2013.
- [7] N. N. Schraudolph, J. Yu, and S. Günter. A stochastic quasi-newton method for online convex optimization. In *International Conference on Artificial Intelligence and Statistics*, pages 436–443, 2007.
